# Supplementary material for: Rapid room-temperature synthesis of ultrasmall cubic Mg–Mn spinel cathode materials for rechargeable Mg-ion batteries
Source: Royal Society of Chemistry journal article supplement (doi:10.1039/c9ra08626a), 2019-01-01
Supplement: c9ra08626a1.pdf [file c9ra08626a1.pdf]

Supplementary Information for

**Rapid room-temperature synthesis of ultrasmall cubic Mg–Mn spinel  
cathode materials for rechargeable Mg-ion battery**

*Hiroaki Kobayashi,<sup>\*a</sup> Kazuya Yamaguchi<sup>b</sup> and Itaru Honma<sup>a</sup>*

<sup>a</sup>Institute of Multidisciplinary Research for Advanced Materials, Tohoku University, 2-1-1  
Katahira, Aoba-ku, Sendai, Miyagi, 980-8577, Japan.

<sup>b</sup>Department of Applied Chemistry, School of Engineering, The University of Tokyo, 7-3-1  
Hongo, Bunkyo-ku, Tokyo, 113-8656, Japan.

\*Corresponding author

Email: [h.kobayashi@tohoku.ac.jp](mailto:h.kobayashi@tohoku.ac.jp)

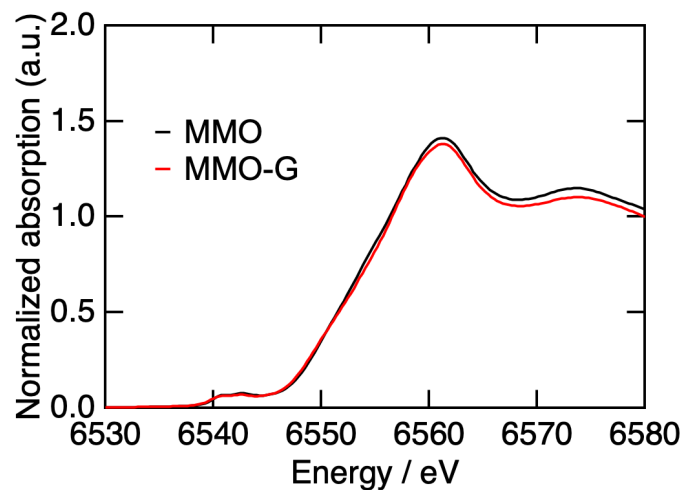

**Fig. S1.** Mn *K*-edge XANES spectra of MMO and MMO-G.

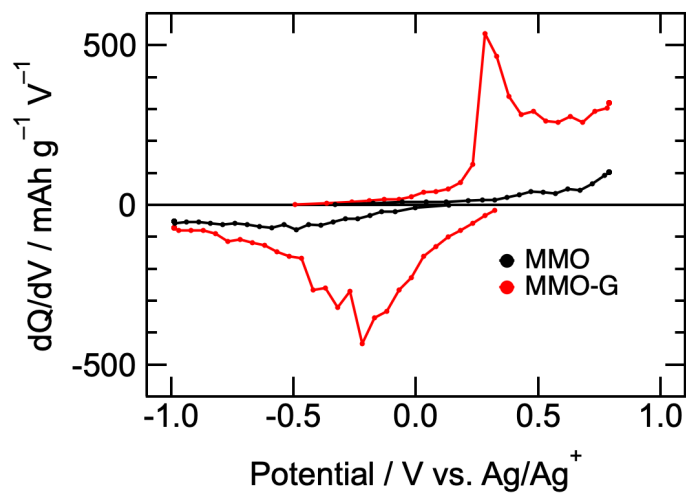

**Fig. S2.** dQ/dV curves of MMO and MMO-G cathodes.

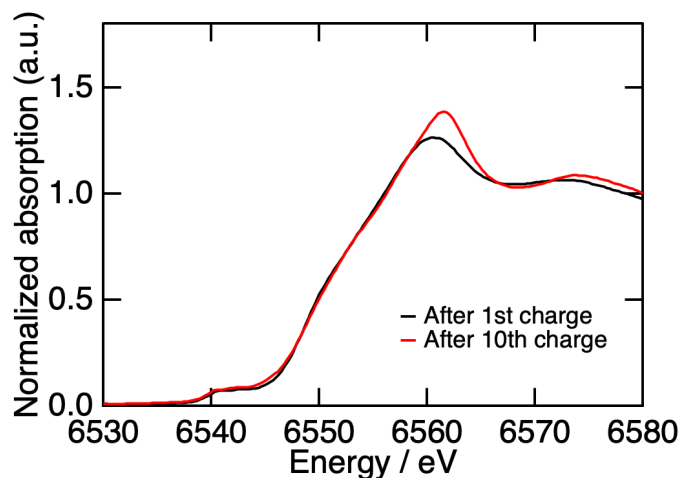

**Fig. S3.** Mn K-edge XANES spectra of MMO-G electrode after 1st and 10th charge.

**Table S1.** Comparison of the cathode performances for  $\text{MgMn}_2\text{O}_4$  with anhydrous electrolytes.

| Procedure<br>(Calcination<br>condition) | Particle<br>size | Electrolyte                                                         | Discharge<br>capacity                              | Current<br>density                                | Ref.         |
|-----------------------------------------|------------------|---------------------------------------------------------------------|----------------------------------------------------|---------------------------------------------------|--------------|
| Coprecipitation<br>(500 °C, 24 h)       | Not<br>indicated | $\text{Mg}(\text{TFSA})_2/\text{CsTFSA}$<br>(150°C)                 | 150 mAh g <sup>-1</sup><br>200 mAh g <sup>-1</sup> | 13.5 mA g <sup>-1</sup><br>5.4 mA g <sup>-1</sup> | [12]         |
| Coprecipitation<br>(750 °C, 6 h)        | 200 nm           | 0.2 M $\text{Mg}(\text{Ac})_2$<br>+ 0.1 M $\text{AlCl}_3/\text{PC}$ | 102 mAh g <sup>-1</sup>                            | Not<br>indicated                                  | [15]         |
| Sol-gel<br>(400 °C, 10 h)               | 17 nm            | 0.5 M $\text{Mg}(\text{ClO}_4)_2$<br>/EC-DEC                        | 120 mAh g <sup>-1</sup>                            | 10 $\mu\text{A}$                                  | [16]         |
| Sol-gel<br>(400 °C, 10 h)               | 11 nm            | 0.5 M $\text{Mg}(\text{TFSA})_2$<br>+ 0.5 M DPGDME/AN               | 220 mAh g <sup>-1</sup><br>80 mAh g <sup>-1</sup>  | 27 mA g <sup>-1</sup><br>135 mA g <sup>-1</sup>   | [18]         |
| Sol-gel<br>(550 °C, 10 h)               | 31 nm            | 0.5 M $\text{Mg}(\text{TFSA})_2$<br>+ 0.5 M DPGDME/AN               | 70 mAh g <sup>-1</sup><br>50 mAh g <sup>-1</sup>   | 27 mA g <sup>-1</sup><br>135 mA g <sup>-1</sup>   | [18]         |
| Sol-gel<br>(650 °C, 12 h)               | 40 nm            | 0.5 M $\text{Mg}(\text{ClO}_4)_2/\text{AN}$                         | 100 mAh g <sup>-1</sup>                            | 4 mA g <sup>-1</sup>                              | [19]         |
| Sol-gel<br>(700 °C, 24 h)               | 120 nm           | $\text{Mg}(\text{TFSA})_2/\text{EC-PC}$                             | 225 mAh g <sup>-1</sup>                            | 1 mA g <sup>-1</sup>                              | [23]         |
| Alcohol reduction<br>(r.t., 30 min)     | 5 nm             | 0.5 M $\text{Mg}(\text{ClO}_4)_2/\text{AN}$                         | 230 mAh g <sup>-1</sup><br>150 mAh g <sup>-1</sup> | 10 mA g <sup>-1</sup><br>190 mA g <sup>-1</sup>   | This<br>work |
